# Supplementary material for: Infection of honey bees with acute bee paralysis virus does not trigger humoral or cellular immune responses
Source: PubMed Central journal article supplement — Arch Virol. 2012 Jan 19;157(4):689–702. doi: 10.1007/s00705-012-1223-0 (PMC3314816; doi:10.1007/s00705-012-1223-0), 2012-01-19
Supplement: 705_2012_1223_MOESM1_ESM.pdf [file 705_2012_1223_MOESM1_ESM.pdf]

Journal: Archives of Virology

Title: Infection of honey bees with Acute bee paralysis virus does not trigger humoral or cellular immune responses

Authors: Klara Azzami · Wolfgang Ritter · Jürgen Tautz · Hildburg Beier

Corresponding author: H. Beier, BEEgroup, Biocentre, University of Würzburg, Am Hubland, D-97074 Würzburg, Germany, e-mail: h.beier@biozentrum.uni-wuerzburg.de

**Table S1** Proteins up-regulated in fourth instar bee larvae 24 h post-injection of  $10^3$  ABPV particles (illustrated in Fig. 3A and Fig. 4A)

| No. | Protein                                                    | Accession (NCBI) | Calc. masses [Da] <sup>a</sup> | SP <sup>b</sup> | Mowse score <sup>d</sup> | Sequence coverage [%] <sup>e</sup> |
|-----|------------------------------------------------------------|------------------|--------------------------------|-----------------|--------------------------|------------------------------------|
| 1   | Glycogen phosphorylase                                     | 66557932         | 97.329                         | -               | 490                      | 14                                 |
|     | Elongation factor-2 like                                   | 66508439         | 94.582                         | -               | 510                      | 15                                 |
|     | TER 94                                                     | 66534286         | 88.895                         | -               | 190                      | 13                                 |
| 2   | Heat shock protein 90                                      | 229892248        | 83.383                         | -               | 415                      | 31                                 |
|     | Heat shock protein 1 $\alpha$                              | 110749824        | 82.753                         | -               | 375                      | 22                                 |
| 3   | Heat shock protein cognate 5                               | 229892203        | 75.403                         | -               | 509                      | 18                                 |
| 4   | Protein disulfide-isomerase A3 (ERp60)                     | 66546657         | 55.856                         | 18              | 406                      | 19                                 |
|     | Hexamerin 70a (238-684) <sup>c</sup>                       | 148357839        | 53.497                         | 21              | 593                      | 41                                 |
|     | Hexamerin 70b (255-683) <sup>c</sup>                       | 58585148         | 49.359                         | 21              | 805                      | 46                                 |
| 5   | Major Royal Jelly Protein 1                                | 58585098         | 48.886                         | 19              | 810                      | 45                                 |
| 6   | 3-Ketoacyl-CoA thiolase<br>(=Yippee interacting protein 2) | 48097100         | 42.503                         | -               | 1258                     | 68                                 |
| 7   | Aldose reductase like                                      | 66525576         | 36.082                         | -               | 360                      | 33                                 |
|     | Lambda crystallin-like protein                             | 209180477        | 35.860                         | -               | 392                      | 29                                 |
|     | Glyceraldehyde-3-phosphate dehydrogenase 2                 | 48142692         | 35.883                         | -               | 333                      | 30                                 |
| 8   | N-acetylneuraminate pyruvate lyase                         | 110755974        | 34.019                         | -               | 243                      | 24                                 |
| 9   | Trypsin-like serine protease                               | 110762229        | 28.596                         | 18              | 340                      | 25                                 |
|     | 15-Hydroxyprostaglandin dehydrogenase                      | 66518230         | 28.776                         | -               | 310                      | 23                                 |
|     | 3-Hydroxyacyl-CoA dehydrogenase                            | 110760701        | 27.099                         | -               | 189                      | 18                                 |
|     | Short-chain dehydrogenase/reductase (SDR)                  | 58585184         | 27.191                         | -               | 175                      | 27                                 |
|     | Proteasome subunit alpha                                   | 66541426         | 26.718                         | -               | 144                      | 19                                 |
| 10  | Heat shock protein beta-1-like                             | 110757651        | 25.565                         | -               | 160                      | 14                                 |
|     | Peroxiredoxin-like protein                                 | 283436152        | 25.133                         | -               | 143                      | 13                                 |
|     | Glutathione S-transferase S1                               | 237681308        | 23.761                         | -               | 173                      | 27                                 |
| 11  | Thioredoxin-2                                              | 48104680         | 12.016                         | -               | 185                      | 16                                 |
|     | Heat shock protein 10kD                                    | 66547447         | 11.403                         | -               | 390                      | 41                                 |

<sup>a</sup> Molecular weights were deduced from the Expasy/ProtParam program

<sup>b</sup> Predictions for signal peptides (SP) and cleavage sites were obtained with the TargetP program

<sup>c</sup> Putative lengths of degradation products

<sup>d</sup> Protein scores are derived from ion scores. Individual ion scores >60 indicate identity or extensive homology (p<0.05)

<sup>e</sup> The sequence coverage represents the percentage of coverage by tryptic peptides
